# Supplementary material for: Controlling electronic properties of MoS2/graphene oxide heterojunctions for enhancing photocatalytic performance: the role of oxygen
Source: Royal Society of Chemistry journal article supplement (doi:10.1039/c7cp07303h), 2017-12-20
Supplement: c7cp07303h1.pdf [file c7cp07303h1.pdf]

## Supporting Information (SI)

# Controlling Electronic Properties of MoS<sub>2</sub>/Graphene Oxide Heterojunctions for Enhancing Photocatalytic Performance: the Role of Oxygen

Xiaotian Hua,<sup>a</sup> Xinguo Ma,<sup>\*abc</sup> Jisong Hu,<sup>a</sup> Hua He,<sup>a</sup> Guowang Xu,<sup>a</sup> Chuyun Huang,<sup>\*b</sup> Xiaobo Chen<sup>\*c</sup>

<sup>a</sup> School of Science, Hubei University of Technology, Wuhan 430068, China. E-mail: maxg2013@sohu.com

<sup>b</sup> Hubei Collaborative Innovation Center for High-efficiency Utilization of Solar Energy, Hubei University of Technology, Wuhan 430068, China. E-mail: chuyunh@163.com

<sup>c</sup> Department of Chemistry, University of Missouri-Kansas City, Kansas City, MO 64110, USA E-mail: chenxiaobo@umkc.edu

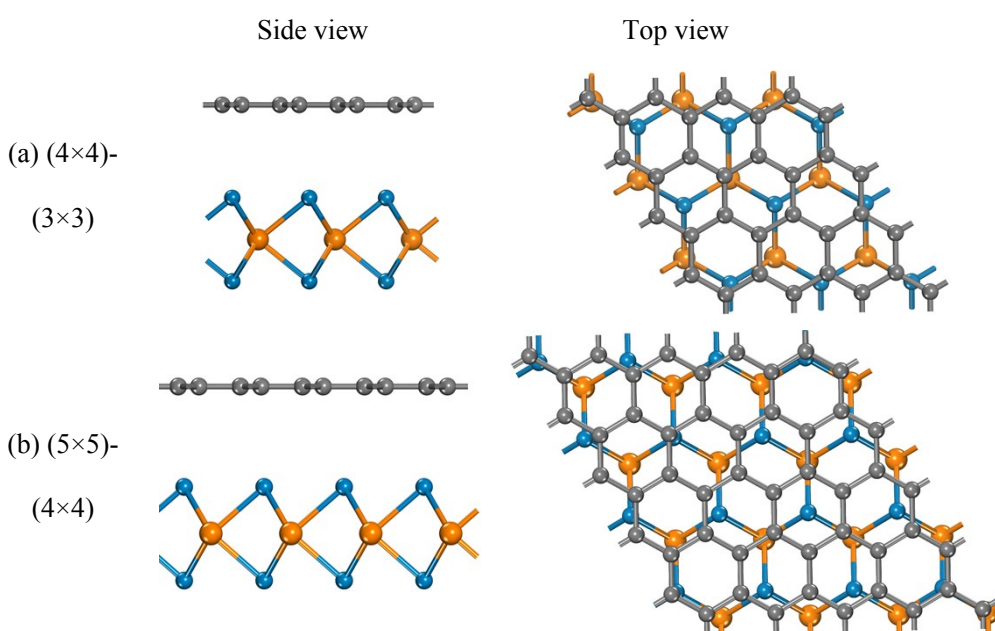

**Fig. S1** Side views and top views of two match configurations of MoS<sub>2</sub>/GR heterojunctions: (a) match configuration between 3×3 lateral periodicity of 1L MoS<sub>2</sub> sheet and 4×4 lateral periodicity of GR; (b) match configuration between 4×4 lateral periodicity of 1L MoS<sub>2</sub> sheet and 5×5 lateral periodicity of GR.

| Structure                              | Top view                                                                            | Side view                                                                            | Total energy |
|----------------------------------------|-------------------------------------------------------------------------------------|--------------------------------------------------------------------------------------|--------------|
| MoS <sub>2</sub> /GO-A2<br><b>(A2)</b> | 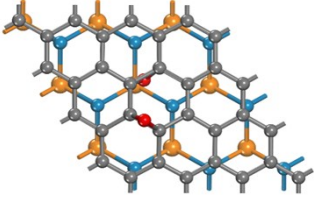   |    | -28289.715   |
| MoS <sub>2</sub> /GO-D2                |    |    | -28288.661   |
| MoS <sub>2</sub> /GO-E2                |    |    | -28289.614   |
| MoS <sub>2</sub> /GO-F2                |   |   | -28289.327   |
| MoS <sub>2</sub> /GO-G2                |  |  | -28289.191   |
| MoS <sub>2</sub> /GO-H2                |  |  | -28289.122   |
| MoS <sub>2</sub> /GO-I2                |  |  | -28289.110   |
| MoS <sub>2</sub> /GO-B2<br><b>(B2)</b> |  |  | -28285.583   |
| MoS <sub>2</sub> /GO-C2<br><b>(C2)</b> |  |  | -28286.166   |

**Fig. S2** Top views and side views of the optimized MoS<sub>2</sub>/GO heterojunctions with two O atoms in interface using GGA-PBE formalism with TS scheme.

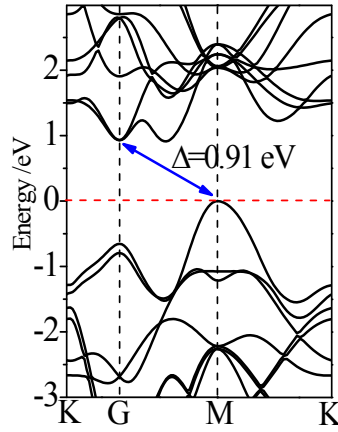

**Fig. S3** Energy band structures of bulk MoS<sub>2</sub>. The Fermi level is set to zero and marked by red dashed line.

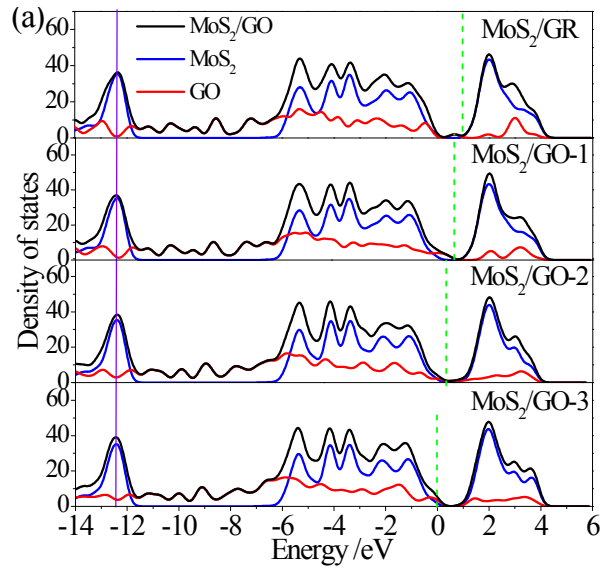

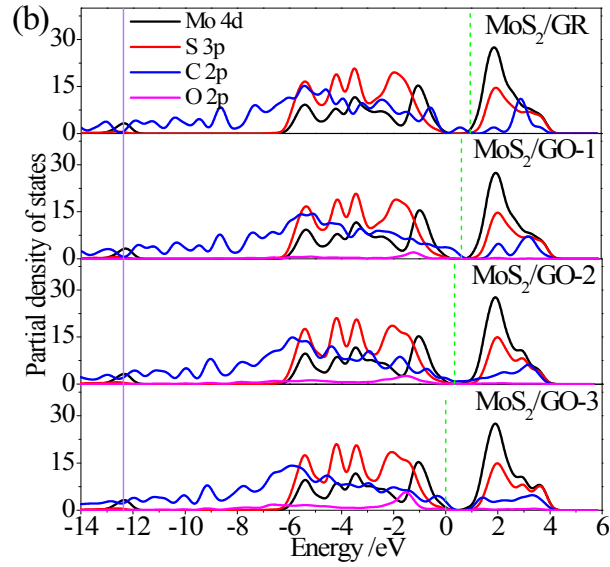

**Fig. S4** (a) Density of states of MoS<sub>2</sub>/GR and MoS<sub>2</sub>/GO heterojunctions, and (b) partial density of states of Mo, S, C and O in the heterojunctions with different O concentrations. The peak of C 2p state at -12.4 eV is taken as the reference point to calibrate the energy levels near the Fermi levels. The Fermi levels are marked by green dashed lines.

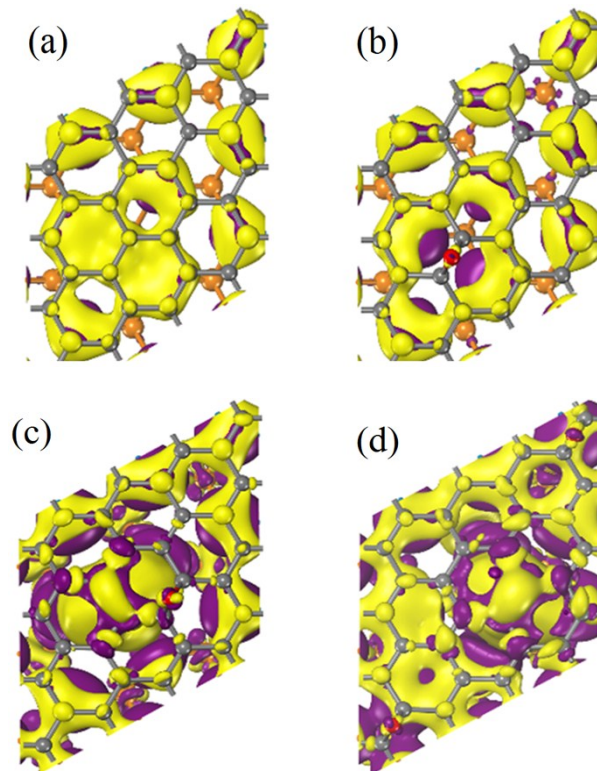

**Fig. S5** Side views of the 3D charge density differences of (a) MoS<sub>2</sub>/GR, (b) MoS<sub>2</sub>/GO-1, (c) MoS<sub>2</sub>/GO-2, and (d) MoS<sub>2</sub>/GO-3 heterojunctions.
